# Supplementary material
Source: PubMed Central journal article supplement (PMC6061234)
Supplement: TX-007-C7TX00234C-s001.pdf [file TX-007-C7TX00234C-s001.pdf]

## Supporting Information

# Mitochondrial toxicity of organic arsenical: membrane permeability transition pore opening and respiratory dysfunction

Xiao-Yang Fan<sup>a</sup>, Lian Yuan<sup>a</sup>, Can Wu<sup>d</sup>, Yu-Jiao Liu<sup>a</sup>, Feng-Lei Jiang<sup>a</sup>, Yan-Jun Hu<sup>c</sup>, Yi Liu<sup>a, b, c,\*</sup>

**Scheme S1.** The molecular structure of organic arsenical **MOPIMP**.

**Figure S1.** The collapse of membrane potential in isolated mitochondria.

**Figure S2.** The release of cytochrome *c* from isolated mitochondria treated with different concentrations of compound **MOPIMP**.

**Figure S3.** Increase of the mitochondrial membrane fluidity. After treated with compound **MOPIMP**, the drop of anisotropy *r* demonstrated the increase of membrane fluidity. The experiment was repeated more than three times.

**Figure S4.** The lipid peroxidation induced by compound **MOPIMP**.

**Table S1.** Influence of organic arsenical **MOPIMP** on mitochondrial metabolism parameters <sup>a</sup>

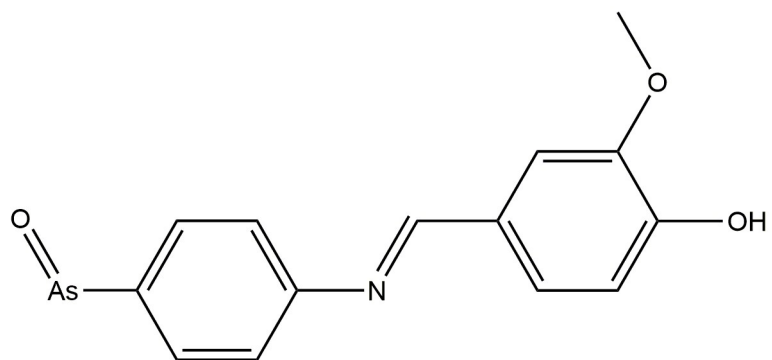

**Scheme S1.** The molecular structure of organic arsenical **MOPIMP**.

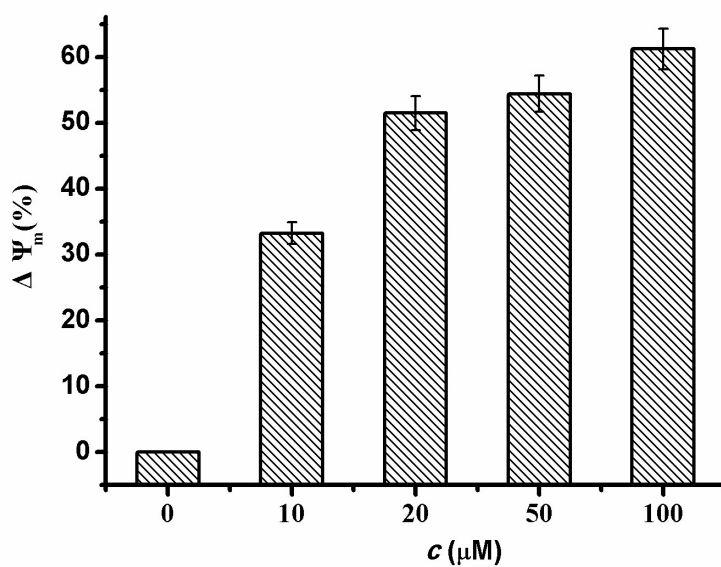

**Figure S1.** The collapse of membrane potential in isolated mitochondria. The ratio of recovery fluorescence intensity and decreased fluorescence intensity was shown in bar figure. The addition of compound **MOPIMP** decreased the isolated mitochondrial membrane potential obviously in a concentration-dependent way. The experiment was repeated more than twice.

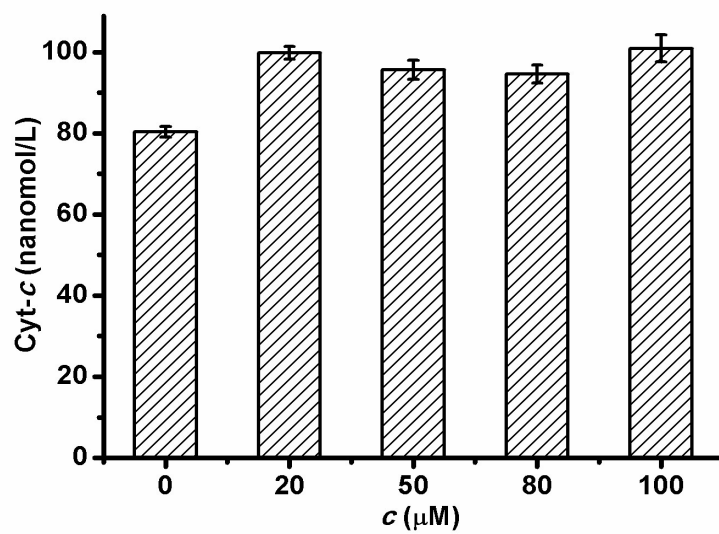

**Figure S2.** The release of cytochrome *c* from isolated mitochondria treated with different concentrations of compound **MOPIMP**. The treatment of compound **MOPIMP** increased the release of cytochrome *c*. The experiment was repeated more than twice.

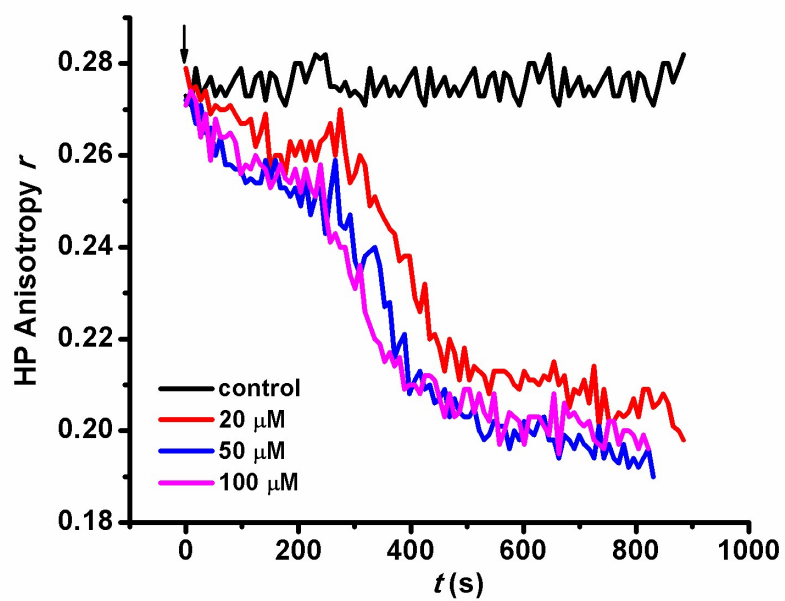

**Figure S3.** Increase of the mitochondrial membrane fluidity. After treated with compound **MOPIMP**, the drop of anisotropy  $r$  demonstrated the increase of membrane fluidity. The experiment was repeated more than three times.

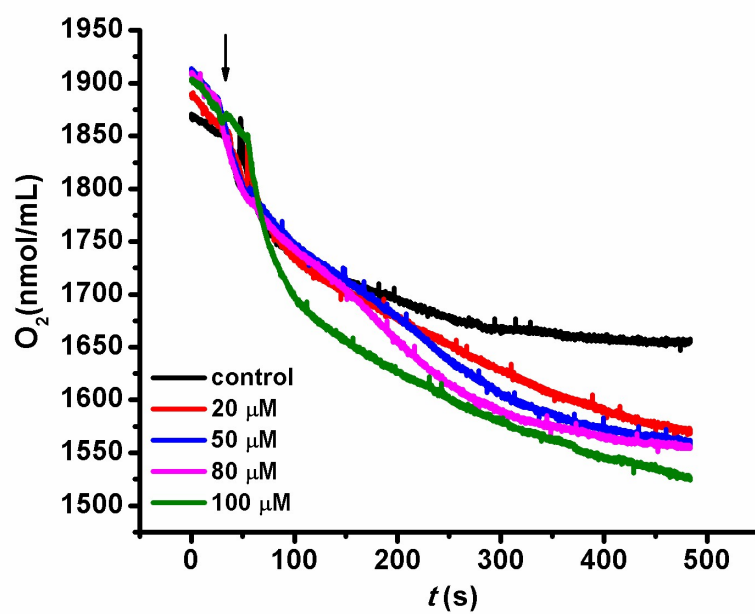

**Figure S4.** The lipid peroxidation induced by compound **MOPIMP**. The addition of compound **MOPIMP** stimulated the oxygen consumption in a dose-dependent manner, which reflected the occurrence of lipid peroxidation. The experiment was repeated more than three times.

**Table S1.** Influence of organic arsenical **MOPIMP** on mitochondrial metabolism parameters <sup>a</sup>

| <b><i>c</i> (μM)</b>                                           | 0      | 5     | 10    | 15    | 20    |
|----------------------------------------------------------------|--------|-------|-------|-------|-------|
| <b><i>k</i><sub>1</sub> (10<sup>-3</sup> min<sup>-1</sup>)</b> | 5.86   | 4.28  | 4.55  | 3.26  | 2.88  |
| <b>R<sub>1</sub><sup>2</sup></b>                               | 0.99   | 0.99  | 0.99  | 0.99  | 0.99  |
| <b><i>k</i><sub>2</sub> (10<sup>-3</sup> min<sup>-1</sup>)</b> | 0.85   | 0.15  | 0.85  | -     | -     |
| <b>R<sub>2</sub><sup>2</sup></b>                               | 0.99   | 0.99  | 0.99  | -     | -     |
| <b><i>k</i><sub>3</sub> (10<sup>-3</sup> min<sup>-1</sup>)</b> | -14.23 | -8.55 | -0.52 | -0.51 | -0.37 |
| <b>R<sub>3</sub><sup>2</sup></b>                               | 0.99   | 0.99  | 0.99  | 0.99  | 0.99  |
| <b><i>P</i><sub>m</sub> (W)</b>                                | 132.93 | 63.66 | 51.41 | 45.46 | 45.46 |
| <b><i>t</i><sub>m</sub> (h)</b>                                | 59.26  | 69.11 | 38.36 | 50.77 | 65.21 |
| <b><i>Q</i> (J)</b>                                            | 11.91  | 12.30 | 9.27  | 7.39  | 4.16  |

<sup>a</sup> *k*<sub>1</sub>: rate constant in activity recovery phase ; *k*<sub>2</sub>: rate constant in stationary increase phase; *k*<sub>3</sub>: rate constant in decline phase; R: correlation coefficient; *P*<sub>m</sub>: maximum power output; *t*<sub>m</sub>: maximum power output time; *Q*: total heat output.
